# Supplementary material
Source: PubMed Central journal article supplement (PMC3465513)
Supplement: NIHMS376158-supplement-01.pdf [file NIHMS376158-supplement-01.pdf]

## Neural Activations During Auditory Oddball Processing Discriminating Schizophrenia and Psychotic Bipolar Disorder

### *Supplemental Information*

**Table S1.** Medication information for each patient group, with the total number of subjects taking at least one medication in each drug class.

| <b>Medication</b>                        | <b>SZ</b> | <b>BPP</b> |
|------------------------------------------|-----------|------------|
| <i>Antidepressants</i>                   |           |            |
| Bupropion                                | 5         | 6          |
| Buspirone                                | 3         | 5          |
| Citalopram                               | 3         | 3          |
| Duloxetine                               | 3         | 3          |
| Escitalopram                             | 1         | 2          |
| Fluoxetine                               | 4         | 4          |
| Fluvoxamine                              | 1         | 1          |
| Mirtazapine                              | 0         | 1          |
| Paroxetine                               | 3         | 0          |
| Sertraline                               | 3         | 0          |
| Trazodone                                | 8         | 11         |
| Venlafaxine                              | 1         | 1          |
| <b>Subjects on at least 1 medication</b> | <b>22</b> | <b>27</b>  |
| <i>Anticholinergics</i>                  |           |            |
| Benzatropine                             | <b>9</b>  | <b>4</b>   |
| <i>Anticonvulsants/Mood Stabilizers</i>  |           |            |
| Carbamazepine                            | 1         | 1          |
| Gabapentin                               | 1         | 0          |
| Lamotrigine                              | 2         | 12         |
| Lithium                                  | 3         | 13         |
| Oxcarbazepine                            | 1         | 6          |
| Topiramate                               | 0         | 1          |
| Valproate                                | 4         | 7          |
| Zolpidem                                 | 3         | 2          |
| <b>Subjects on at least 1 medication</b> | <b>8</b>  | <b>25</b>  |
| <i>First Generation Antipsychotics</i>   |           |            |
| Chlorpromazine                           | 1         | 2          |
| Fluphenazine                             | 3         | 1          |
| Haloperidol                              | 7         | 1          |
| Loxapine                                 | 1         | 0          |
| Perphenazine                             | 0         | 1          |

|                                          |           |           |
|------------------------------------------|-----------|-----------|
| Thiothixene                              | 1         | 1         |
| <b>Subjects on at least 1 medication</b> | <b>11</b> | <b>6</b>  |
| <i>Second Generation Antipsychotics</i>  |           |           |
| Aripiprazole                             | 13        | 6         |
| Clozapine                                | 6         | 2         |
| Olanzapine                               | 3         | 4         |
| Paliperidone                             | 3         | 1         |
| Quetiapine                               | 11        | 17        |
| Risperidone                              | 15        | 11        |
| Ziprasidone                              | 5         | 4         |
| <b>Subjects on at least 1 medication</b> | <b>43</b> | <b>38</b> |
| <i>Sedatives</i>                         |           |           |
| Alprazolam                               | 2         | 2         |
| Chlordiazepoxide                         | 0         | 1         |
| Clonazepam                               | 5         | 9         |
| Diazepam                                 | 2         | 0         |
| Lorazepam                                | 4         | 4         |
| Temazepam                                | 1         | 1         |
| Zaleplon                                 | 1         | 0         |
| <b>Subjects on at least 1 medication</b> | <b>17</b> | <b>16</b> |
| <i>Stimulants</i>                        |           |           |
| Atomoxetine                              | 1         | 2         |
| Dexmethylphenidate                       | 1         | 0         |
| Dextro-a-amphetamine                     | 1         | 2         |
| Lisdexamphetamine                        | 0         | 1         |
| Methylphenidate                          | 2         | 1         |
| <b>Subjects on at least 1 medication</b> | <b>3</b>  | <b>3</b>  |

BPP, bipolar I with psychosis; SZ, schizophrenia.

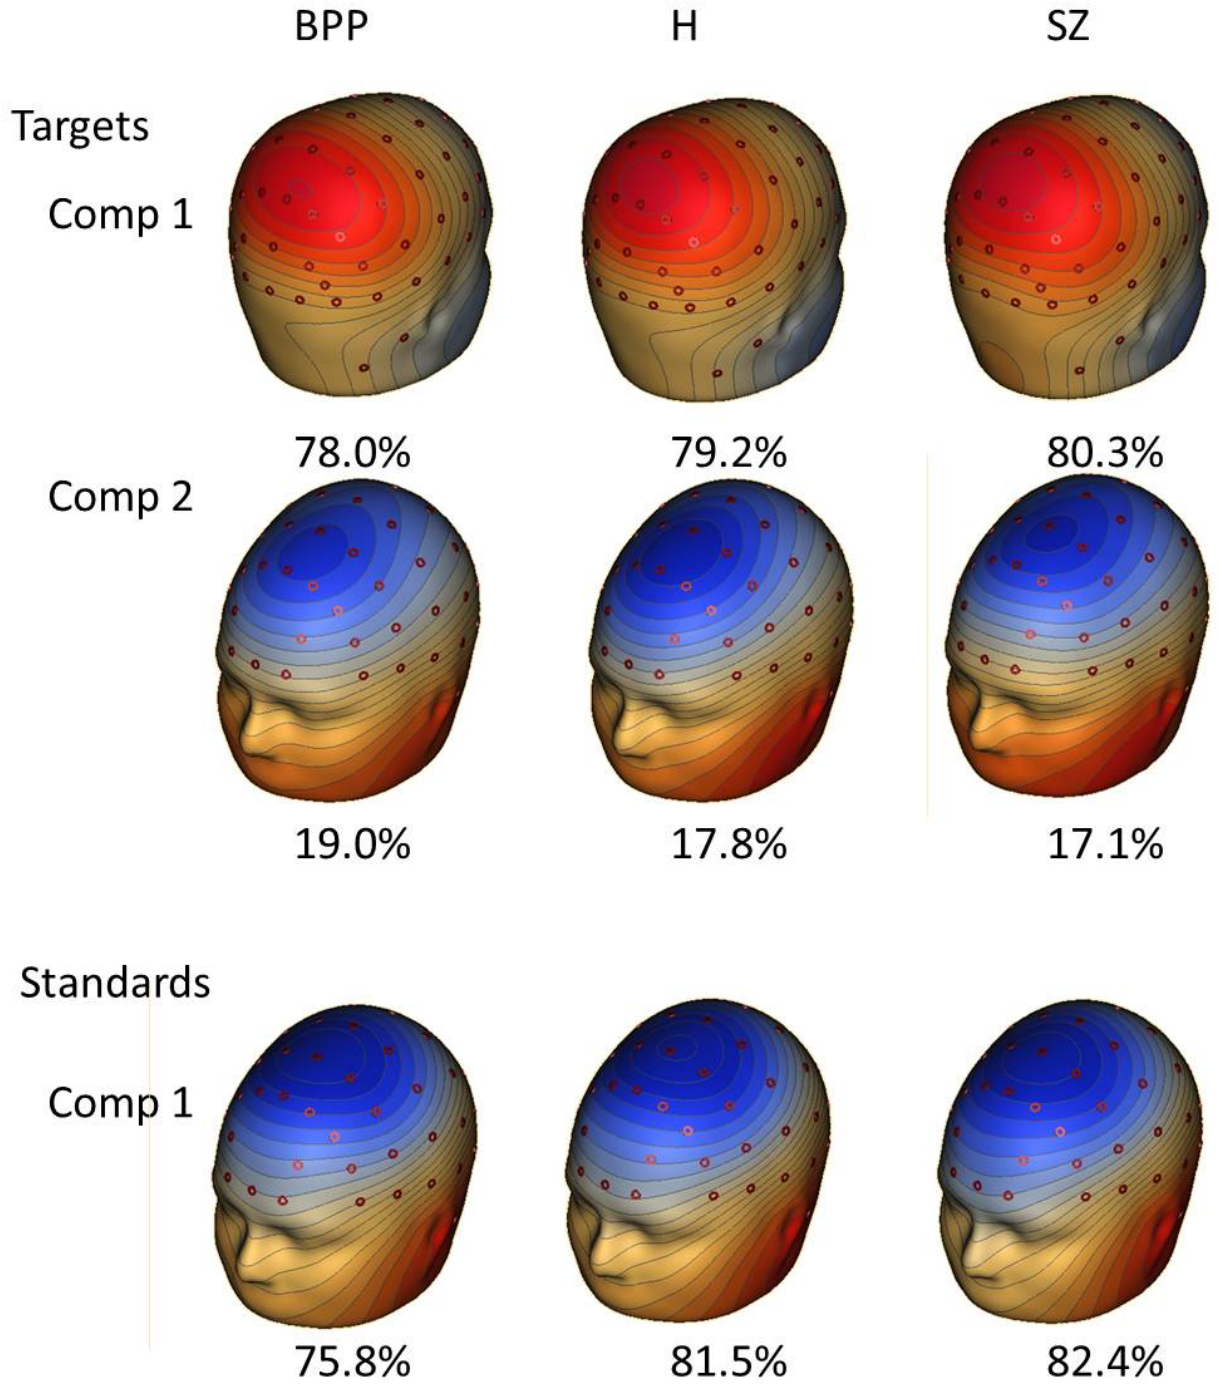

**Figure S1.** Principal components analysis topographies by group, with percent variance accounted for by each component (Comp). BPP, bipolar I with psychosis; H, healthy; SZ, schizophrenia.

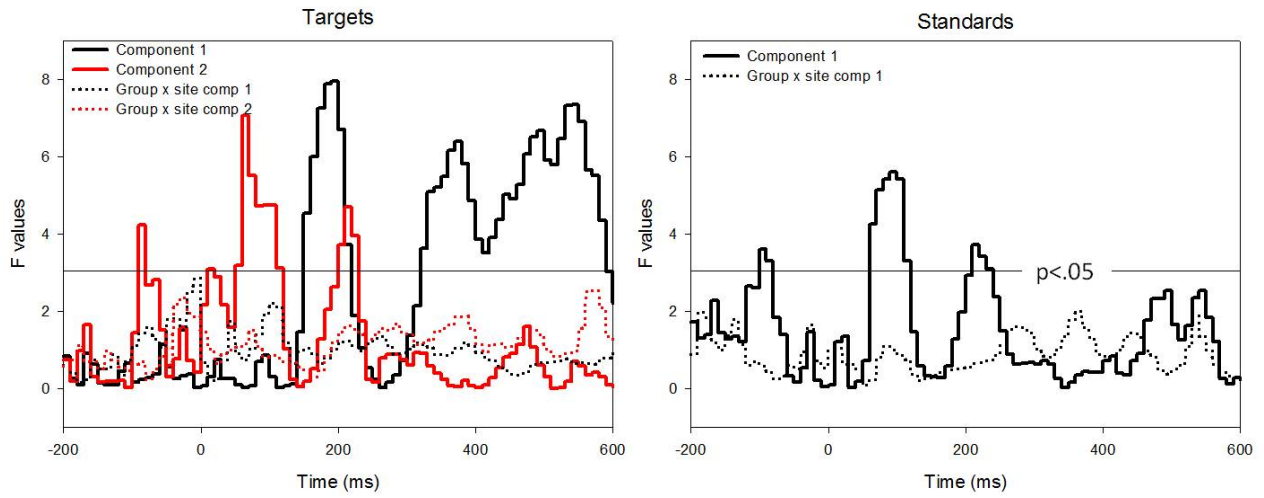

**Figure S2.** *F* value plots for event-related potential time-bins by condition and factor. Solid lines indicate *F* values for main effects, while dotted lines indicate the interaction, or site effects. Horizontal gray line marks the *F* value at which  $p < .05$ . Note that no site effects reached significance. comp, component.

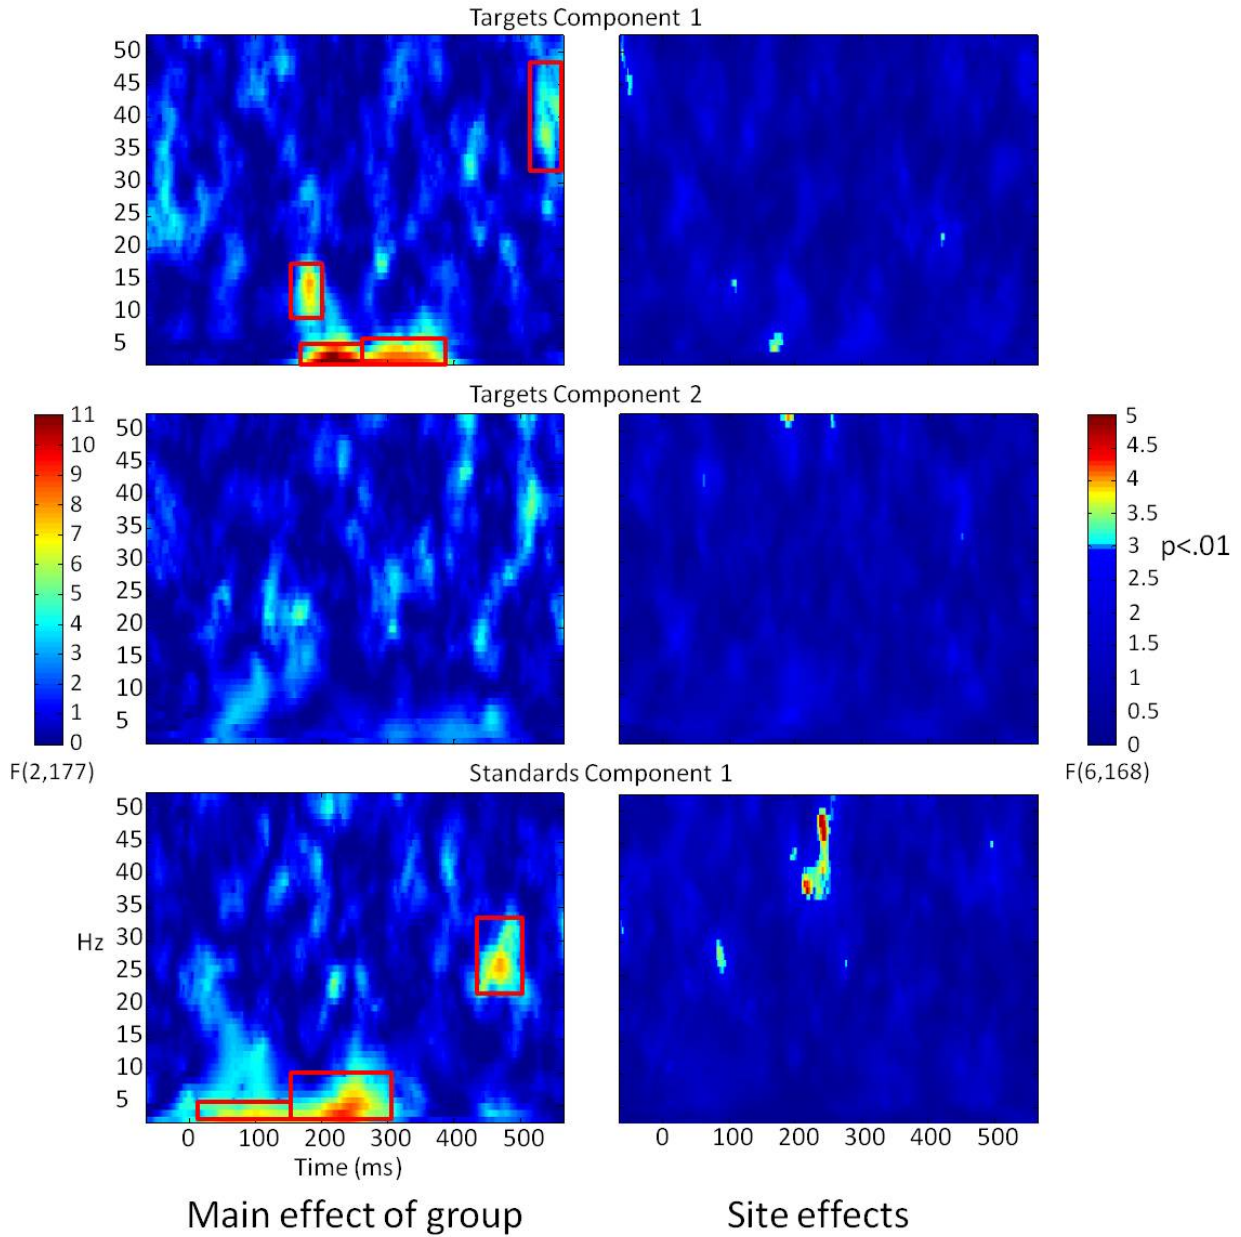

**Figure S3.** *F* value plots for time-frequency clusters by condition and factor. Left column indicates main effects of group, with significant clusters outlined in red. Right column indicates site effects, scaled to accentuate significant time-points ( $p < .01$ ). Note that significant site effect time-points do not overlap with any significant main effect clusters.
